# Supplementary material for: Global human-made mass exceeds all living biomass
Source: Springer Nature journal article supplement (doi:10.1038/s41586-020-3010-5), 2020-12-09
Supplement: 41586_2020_3010_MOESM2_ESM.pdf [file 41586_2020_3010_MOESM2_ESM.pdf]

## Reporting Summary

Nature Research wishes to improve the reproducibility of the work that we publish. This form provides structure for consistency and transparency in reporting. For further information on Nature Research policies, see [Authors & Referees](#) and the [Editorial Policy Checklist](#).

### Statistics

For all statistical analyses, confirm that the following items are present in the figure legend, table legend, main text, or Methods section.

n/a Confirmed

- The exact sample size ( $n$ ) for each experimental group/condition, given as a discrete number and unit of measurement
- A statement on whether measurements were taken from distinct samples or whether the same sample was measured repeatedly
- The statistical test(s) used AND whether they are one- or two-sided  
*Only common tests should be described solely by name; describe more complex techniques in the Methods section.*
- A description of all covariates tested
- A description of any assumptions or corrections, such as tests of normality and adjustment for multiple comparisons
- A full description of the statistical parameters including central tendency (e.g. means) or other basic estimates (e.g. regression coefficient) AND variation (e.g. standard deviation) or associated estimates of uncertainty (e.g. confidence intervals)
- For null hypothesis testing, the test statistic (e.g.  $F$ ,  $t$ ,  $r$ ) with confidence intervals, effect sizes, degrees of freedom and  $P$  value noted  
*Give  $P$  values as exact values whenever suitable.*
- For Bayesian analysis, information on the choice of priors and Markov chain Monte Carlo settings
- For hierarchical and complex designs, identification of the appropriate level for tests and full reporting of outcomes
- Estimates of effect sizes (e.g. Cohen's  $d$ , Pearson's  $r$ ), indicating how they were calculated

*Our web collection on [statistics for biologists](#) contains articles on many of the points above.*

### Software and code

Policy information about [availability of computer code](#)

Data collection

All code used in this study is available on GitHub, at [https://github.com/milo-lab/anthropogenic\\_mass](https://github.com/milo-lab/anthropogenic_mass).

Data analysis

All code used in this study is available on GitHub, at [https://github.com/milo-lab/anthropogenic\\_mass](https://github.com/milo-lab/anthropogenic_mass).

For manuscripts utilizing custom algorithms or software that are central to the research but not yet described in published literature, software must be made available to editors/reviewers. We strongly encourage code deposition in a community repository (e.g. GitHub). See the Nature Research [guidelines for submitting code & software](#) for further information.

### Data

Policy information about [availability of data](#)

All manuscripts must include a [data availability statement](#). This statement should provide the following information, where applicable:

- Accession codes, unique identifiers, or web links for publicly available datasets
- A list of figures that have associated raw data
- A description of any restrictions on data availability

All data used in this study are available on GitHub, at [https://github.com/milo-lab/anthropogenic\\_mass](https://github.com/milo-lab/anthropogenic_mass). Anthropogenic mass data is available from ref. 22 and at: <https://boku.ac.at/wiso/sec/data-download>. TRENDY Dynamic Global Vegetation Models outputs are available at: <https://sites.exeter.ac.uk/trendy>. Leaves dry matter content measurements were obtained via TryDB, at: <https://www.try-db.org/>. Other datasets used in this study are available from published literature, as detailed in the Methods section and Supplementary Information.

## Field-specific reporting

Please select the one below that is the best fit for your research. If you are not sure, read the appropriate sections before making your selection.

Life sciences       Behavioural & social sciences       Ecological, evolutionary & environmental sciences

For a reference copy of the document with all sections, see [nature.com/documents/nr-reporting-summary-flat.pdf](https://www.nature.com/documents/nr-reporting-summary-flat.pdf)

## Ecological, evolutionary & environmental sciences study design

All studies must disclose on these points even when the disclosure is negative.

|                                   |                                                                                                                                                                                                  |
|-----------------------------------|--------------------------------------------------------------------------------------------------------------------------------------------------------------------------------------------------|
| Study description                 | Quantitative comparison of the global living biomass and human-made mass, since the beginning of the 20th century.                                                                               |
| Research sample                   | Human-made mass data, divided into material sub-groups and living biomass data.                                                                                                                  |
| Sampling strategy                 | All relevant data were used. No statistical methods were used to predetermine sample size.                                                                                                       |
| Data collection                   | Data was based on existing datasets and was collected online by the authors.                                                                                                                     |
| Timing and spatial scale          | Global data since 1900, consistent with the time period and global scope of the study.                                                                                                           |
| Data exclusions                   | No data were excluded from the analyses.                                                                                                                                                         |
| Reproducibility                   | This is not an experimental study, thus experimental replication was not performed. The analysis is reproducible given the code provided, which includes all steps from raw data to end results. |
| Randomization                     | All living organisms were grouped into one group, all human-made masses were grouped into another group.                                                                                         |
| Blinding                          | Not relevant, since this study is not experimental.                                                                                                                                              |
| Did the study involve field work? | <input type="checkbox"/> Yes <input checked="" type="checkbox"/> No                                                                                                                              |

## Reporting for specific materials, systems and methods

We require information from authors about some types of materials, experimental systems and methods used in many studies. Here, indicate whether each material, system or method listed is relevant to your study. If you are not sure if a list item applies to your research, read the appropriate section before selecting a response.

### Materials & experimental systems

|                                     |                                                      |
|-------------------------------------|------------------------------------------------------|
| n/a                                 | Involved in the study                                |
| <input checked="" type="checkbox"/> | <input type="checkbox"/> Antibodies                  |
| <input checked="" type="checkbox"/> | <input type="checkbox"/> Eukaryotic cell lines       |
| <input checked="" type="checkbox"/> | <input type="checkbox"/> Palaeontology               |
| <input checked="" type="checkbox"/> | <input type="checkbox"/> Animals and other organisms |
| <input checked="" type="checkbox"/> | <input type="checkbox"/> Human research participants |
| <input checked="" type="checkbox"/> | <input type="checkbox"/> Clinical data               |

### Methods

|                                     |                                                 |
|-------------------------------------|-------------------------------------------------|
| n/a                                 | Involved in the study                           |
| <input checked="" type="checkbox"/> | <input type="checkbox"/> ChIP-seq               |
| <input checked="" type="checkbox"/> | <input type="checkbox"/> Flow cytometry         |
| <input checked="" type="checkbox"/> | <input type="checkbox"/> MRI-based neuroimaging |
